# Supplementary material for: Parvimonas micra alters gut microbiota and promotes tumor growth through DNA methylation
Source: Research Square preprint supplement (doi:10.21203/rs.3.rs-6977318/v1), 2025-08-25
Supplement: Supplementary file 2 [file 807bf668861a4bab5534e477.pdf]

Table 5. List of hypermethylated and hypomethylated genes and their reported associations with colorectal cancer (CRC) or other cancer types.

| Gene     | Role                                                                                                                                                                                          | Linked to CRC or other cancers                                                                                                                             | Reference                                                                                                                                              |
|----------|-----------------------------------------------------------------------------------------------------------------------------------------------------------------------------------------------|------------------------------------------------------------------------------------------------------------------------------------------------------------|--------------------------------------------------------------------------------------------------------------------------------------------------------|
| Baiap212 | BAIAP2L2 is a BAR domain-containing protein that promotes formation of planar membrane sheets                                                                                                 | BAIAP2L2 is highly expressed in human gastric cancer tissues and promotes proliferation and metastasis of gastric cancer cells                             | doi: 10.1016/j.biopha.2020.110414. Epub 2020 Jun 20. PMID: 32570120.                                                                                   |
| Septin9  | This gene is a member of the septin family involved in cytokinesis and cell cycle control.                                                                                                    | <i>Septin9</i> is a well-established biomarker for CRC and its methylation status is used in colorectal cancer screening.                                  | <a href="https://doi.org/10.1158/2767-9764.CRC-21-0142">https://doi.org/10.1158/2767-9764.CRC-21-0142</a>                                              |
| Espn     | This gene encodes an actin-bundling protein that is essential for organizing and regulating microvillus structures involved in sensory transduction in mechanosensory and chemosensory cells. | ESPN promotes osteosarcoma metastasis by activating ZEB1-driven epithelial–mesenchymal transition (EMT) via the PI3K/AKT/mTOR signaling pathway.           | doi: <a href="https://doi.org/10.1186/s12967-025-06500-8">10.1186/s12967-025-06500-8</a>                                                               |
| Casz1    | CASZ1 is a zinc finger transcription factor that is predicted to have a role in controlling cell fate                                                                                         | Loss of the tumor suppressor CASZ1 is associated with oncogenic disruption of the core regulatory circuitry in neuroblastoma.                              | doi: 10.1038/s41419-022-05314-6.                                                                                                                       |
| Tacc2    | TACC2 encodes a protein involved in cell cycle regulation and may contribute to cancer development.                                                                                           | TACC2 is not a cancer related gene.                                                                                                                        | <ul style="list-style-type: none"> <li>DOI: <a href="https://doi.org/10.1128/MCB.24.14.6403-6409.2004">10.1128/MCB.24.14.6403-6409.2004</a></li> </ul> |
| Mxra7    | Mxra7 is involved in various cellular processes, including cell differentiation, tissue repair, and inflammation.                                                                             | Mxra7 has been shown to be associated with the prognosis of CRC patients.                                                                                  | doi: <a href="https://doi.org/10.3389/fonc.2023.1109181">10.3389/fonc.2023.1109181</a>                                                                 |
| Crmp1    | The Crmp1 gene encodes Collapsin Response Mediator Protein 1, a member of the CRMP family                                                                                                     | CRMP1 functions as a suppressor of tumor growth and metastasis in prostate cancer cells.                                                                   | doi: <a href="https://doi.org/10.1038/onc.2016.227">10.1038/onc.2016.227</a>                                                                           |
| Ephb2    | Ephb2 encodes a receptor tyrosine kinase called Ephrin type-B receptor 2                                                                                                                      | EPHB2 is overexpressed in a subset of colorectal cancers and serves as a significant prognostic indicator.                                                 | doi: <a href="https://doi.org/10.4132/jptm.2018.06.29">10.4132/jptm.2018.06.29</a>                                                                     |
| Gse1     | GSE1 encodes a coiled-coil protein that is part of the CoREST complex, which regulates histone and DNA methylation.                                                                           | GSE1 enhances oncogenic traits and recurrence in castration-resistant prostate cancer by targeting the tumor-associated calcium signal transducer TACSTD2. | doi: <a href="https://doi.org/10.3390/cancers13163959">10.3390/cancers13163959</a>                                                                     |
| Nfate2   | Nfate2 encodes a DNA-binding protein from the NFAT family, featuring REL- and NFAT-homology regions.                                                                                          | NFATC2 is essential for sustaining colorectal cancer stem cells (CRC-SCs).                                                                                 | doi: <a href="https://doi.org/10.2147/OTT.S169129">10.2147/OTT.S169129</a>                                                                             |

|         |                                                                                                                                      |                                                                                                                                                                   |                                                                                                         |
|---------|--------------------------------------------------------------------------------------------------------------------------------------|-------------------------------------------------------------------------------------------------------------------------------------------------------------------|---------------------------------------------------------------------------------------------------------|
| Plch2   | PLCH2 is a member of the PLC-eta family of the phosphoinositide-specific phospholipase C (PLC) superfamily of enzymes                | Phospholipase C Isozymes Are Deregulated in Colorectal Cancer                                                                                                     | doi: <a href="https://doi.org/10.1371/journal.pone.0024419">10.1371/journal.pone.0024419</a>            |
| Cdh23   | Cdh23 is one of the calcium-dependent cell adhesion proteins                                                                         | Epigenetic silencing of CDH23 by methylation is associated with poor prognosis in diffuse large B-cell lymphoma.                                                  | doi: <a href="https://doi.org/10.18632/aging.203268">10.18632/aging.203268</a>                          |
| Cilp2   | CILP2 encodes a protein present in articular and meniscal cartilage.                                                                 | CILP2 may serve as a biomarker and therapeutic target for peritoneal metastases in colorectal cancer.                                                             | doi: 10.1038/s41598-024-63366-4.                                                                        |
| Crtac1  | Crtac1 is a glycosylated extracellular matrix protein that is found in the interterritorial matrix of articular deep zone cartilage. | Crtac1 has been identified as a protective factor in certain kinds of cancer, such as gastric adenocarcinoma and bladder cancer.                                  | doi: 10.1038/s41598-024-61804-x.                                                                        |
| Il12rb1 | The IL12RB1 gene encodes the interleukin-12 receptor beta 1 subunit                                                                  | Disruptive variants in IL12RB1 are significantly more frequent in familial and early-onset colorectal cancer cases than in controls.                              | doi: 10.1002/humu.24057.                                                                                |
| Nav2    | NAV2 encodes a protein involved in tumor development and cell migration.                                                             | NAV2 overexpression predicts poor prognosis in colorectal cancer and promotes invasion via the SSH1L/cofilin-1 pathway.                                           | doi: <a href="https://doi.org/10.1186/s13046-015-0237-3">10.1186/s13046-015-0237-3</a>                  |
| Rbpms   | Rbpms is one of RNA binding protein that mediates the regulation of pre-mRNA alternative splicing (AS)                               | Elevated expression of RBPMS splice variants suppresses cell proliferation in ovarian cancer cells.                                                               | doi: <a href="https://doi.org/10.3390/ijms232314742">10.3390/ijms232314742</a>                          |
| Tbxa2r  | TBXA2R is the gene symbol for the thromboxane A2 receptor.                                                                           | knockdown of TBXA2R or TBXAS1 in human colorectal cancer cells resulted in reducing the malignant potential of colon cancer cells.                                | doi: 10.1016/j.ebiom.2014.12.004.                                                                       |
| Trim2   | Trim2 is a member of the tripartite motif (TRIM) family.                                                                             | TRIM2 is a novel promoter of human colorectal cancer                                                                                                              | doi: 10.1080/00365521.2019.1575463.                                                                     |
| Afap1   | Afap1 is a potential modulator of actin filament integrity in response to cellular signals.                                          | Overexpression of lncRNA AFAP1-AS1 correlates with poor prognosis and promotes tumorigenesis in colorectal cancer.                                                | <a href="https://doi.org/10.1016/j.biopha.2016.04.009">https://doi.org/10.1016/j.biopha.2016.04.009</a> |
| Bex6    | Bex6 is a Brain Expressed X-linked gene 6.                                                                                           | Bex6 is not associated with CRC.                                                                                                                                  | doi: 10.1016/j.gene.2005.05.012.                                                                        |
| Ccr4    | CCR4 encodes a G-protein coupled receptor known as C-C chemokine receptor type 4.                                                    | In colorectal cancer, CCR4 promotes metastasis through the ERK/NF- $\kappa$ B/MMP13 pathway and functions downstream of TNF- $\alpha$ .                           | doi: <a href="https://doi.org/10.18632/oncotarget.10256">10.18632/oncotarget.10256</a>                  |
| Dlgap3  | Dlgap3 is involved in modification of postsynaptic structure and modulation of chemical synaptic transmission.                       | The DLGAP3 gene, also known as SAP97, is occasionally found to have frameshift mutations in colorectal cancer (CRC) with high microsatellite instability (MSI-H). | DOI 10.1007/s12253-017-0297-0                                                                           |

|          |                                                                                                             |                                                                                                                                          |                                                                                                     |
|----------|-------------------------------------------------------------------------------------------------------------|------------------------------------------------------------------------------------------------------------------------------------------|-----------------------------------------------------------------------------------------------------|
| Epha2    | EphA2 is a receptor tyrosine kinase involved in normal development and disease processes.                   | EphA2 plays a significant role in colorectal cancer (CRC) development and progression.                                                   | doi: <a href="https://doi.org/10.1002/cmdc.202300420">10.1002/cmdc.202300420</a>                    |
| Ipcefl   | Interaction Protein for Cytohesin Exchange Factors 1 involved in Signal transduction                        | Ipcefl is involved in papillary thyroid carcinoma.                                                                                       | doi: <a href="https://doi.org/10.7150/jca.98470">10.7150/jca.98470</a>                              |
| Kank1    | KANK1 contributes to the regulation of actin polymerization and inhibits cell migration.                    | KANK1 is related to breast cancer.                                                                                                       | doi: 10.1038/s41467-024-54645-9.                                                                    |
| Pitx1    | PITX1 interacts with p53 and controls cellular processes                                                    | PITX1 plays essential functions in cancer                                                                                                | doi: <a href="https://doi.org/10.3389/fonc.2023.1253238">10.3389/fonc.2023.1253238</a>              |
| Prag1    | Prag1 is a kind of tyrosine protein kinase family                                                           | Patients with CRC showing high <i>PRAG1</i> expression have shorter free recurrence survival (FRS).                                      | <a href="https://doi.org/10.3390/cancers14122981">https://doi.org/10.3390/cancers14122981</a>       |
| Rufy3    | RUFY3 is an ARL8 (616597) effector involved in regulation of endolysosomal trafficking                      | RUFY3 promotes colorectal cancer invasion and metastasis through its interaction with FOXK1.                                             | doi: 10.1038/s41598-017-04011-1.                                                                    |
| Sh3pxd2a | Predicted to enable superoxide-generating NADPH oxidase activator activity.                                 | SH3PXD2A-AS1 is upregulated in 70% CRC tissues and is associated with poor survival.                                                     | doi: <a href="https://doi.org/10.7150/ijbs.58422">10.7150/ijbs.58422</a>                            |
| Vav3     | Vav3 is a guanine nucleotide exchange factor (GEF)                                                          | VAV3 overexpression could be a useful marker for predicting the outcomes of CRC patients.                                                | <a href="https://doi.org/10.1038/srep09360">https://doi.org/10.1038/srep09360</a>                   |
| Vps8     | Vps8 regulates endosomal trafficking and membrane fusion.                                                   | Vps8 is not directly related to CRC.                                                                                                     | <a href="https://doi.org/10.1038/s41467-018-03226-8">https://doi.org/10.1038/s41467-018-03226-8</a> |
| Anks1    | Anks1 enables ephrin receptor binding activity                                                              | Emerging evidence links ANKS1 to cancer development and progression.                                                                     | DOI: <a href="https://doi.org/10.1371/journal.pone.0064817">10.1371/journal.pone.0064817</a>        |
| Anxa2    | Anxa2 is involved in various cellular processes like cell growth, signal transduction, and membrane fusion. | USP10/XAB2/ANXA2 axis promotes DNA damage repair to enhance chemoresistance to oxaliplatin in colorectal cancer                          | <a href="https://doi.org/10.1186/s13046-025-03357-z">https://doi.org/10.1186/s13046-025-03357-z</a> |
| Arid3a   | Arid3a encodes a member of the ARID (AT-rich interaction domain) family of DNA binding proteins.            | ARID3A suppresses colorectal cancer stemness, drug resistance, and tumor growth.                                                         | <a href="https://doi.org/10.1016/j.lfs.2025.123642">https://doi.org/10.1016/j.lfs.2025.123642</a>   |
| Asx13    | Asx13 encodes a chromatin-associated protein involved in epigenetic regulation of gene expression           | Mutations in ASXL genes and disruptions in the MLL4-ASXL-BAP1 axis alter gene regulation and may contribute to colon cancer development. | doi: <a href="https://doi.org/10.1016/j.jbc.2025.108333">10.1016/j.jbc.2025.108333</a>              |

|         |                                                                                                               |                                                                                                                                               |                                                                                                     |
|---------|---------------------------------------------------------------------------------------------------------------|-----------------------------------------------------------------------------------------------------------------------------------------------|-----------------------------------------------------------------------------------------------------|
| Auts2   | The AUTS2 gene encodes a nuclear protein involved in neurodevelopment.                                        | Studies suggest that AUTS2 plays a role in mediating colorectal tumorigenesis.                                                                | doi: <a href="https://doi.org/10.1186/s40164-023-00440-z">10.1186/s40164-023-00440-z</a>            |
| Axin2   | Axin2 is a gene that plays a crucial role in the Wnt signaling pathway.                                       | Variations in <i>AXIN2</i> predict risk and prognosis of colorectal cancer.                                                                   | <a href="https://doi.org/10.1038/s41405-019-0022-z">https://doi.org/10.1038/s41405-019-0022-z</a>   |
| Cct7    | CCT7 is a molecular chaperone that plays significant roles in cancer biology                                  | Elevated expression of chaperonin containing TCP1 subunit 7 (CCT7) serves as a diagnostic and prognostic marker for hepatocellular carcinoma. | doi: <a href="https://doi.org/10.18632/aging.203809">10.18632/aging.203809</a>                      |
| Cntn2   | Cntn2 is a member of the immunoglobulin superfamily of cell adhesion molecules                                | Cntn2 is overexpressed in glioblastoma                                                                                                        | doi: <a href="https://doi.org/10.2147/OTT.S113390">10.2147/OTT.S113390</a>                          |
| Cntn3   | Cntn3 is a member of the immunoglobulin superfamily of cell adhesion molecules                                | CNTN3 expression is significantly reduced in hepatocellular carcinoma (HCC).                                                                  | doi: <a href="https://doi.org/10.3892/ol.2019.10482">10.3892/ol.2019.10482</a>                      |
| Col23a1 | COL23A1 encodes a transmembrane collagen that plays roles in cell adhesion, migration, and tumor progression. | High COL23A1 expression is associated with recurrent non-small cell lung cancer.                                                              | <a href="https://doi.org/10.1038/s41598-017-10134-2">https://doi.org/10.1038/s41598-017-10134-2</a> |
| Crabp1  | The CRABP1 gene encodes cellular retinoic acid-binding protein 1                                              | CRABP1 is identified as epigenetically deregulated genes in colorectal tumorigenesis                                                          | • DOI: <a href="https://doi.org/10.1155/2006/949506">10.1155/2006/949506</a>                        |
| Cul9    | CUL9 ( <i>Cullin 9</i> , also known as PARC) is a member of the Cullin-RING E3 ubiquitin ligase family        | CUL9 is a significant prognostic biomarkers in colorectal cancer.                                                                             | doi: <a href="https://doi.org/10.62347/CHIB8915">10.62347/CHIB8915</a>                              |
| Dennd3  | Dennd3 enables guanyl-nucleotide exchange factor activity.                                                    | Expression of DNM3 is associated with good outcome in colorectal cancer                                                                       | doi: <a href="https://doi.org/10.1515/med-2022-0420">10.1515/med-2022-0420</a>                      |
| Dgkh    | The DGKH gene encodes the protein diacylglycerol kinase eta (DGKH).                                           | DGKH-driven phosphatidic acid metabolism promotes self-renewal and therapy resistance in hepatocellular carcinoma (HCC).                      | doi: 10.1097/HEP.0000000000001158.                                                                  |
| Dnai2   | Dnai2 belongs to the dynein intermediate chain family.                                                        | Dnai2 has not been associated with CRC.                                                                                                       |                                                                                                     |
| Dnm3    | DNM3 ( <i>Dynamin 3</i> ) is a member of the dynamin family of GTPases                                        | Expression of DNM3 is associated with good outcome in colorectal cancer                                                                       | doi: <a href="https://doi.org/10.1515/med-2022-0420">10.1515/med-2022-0420</a>                      |
| Exoc7   | EXOC7 is a gene encoding a critical subunit of the exocyst complex                                            | High EXOC7 expression is linked to advanced stage, metastasis, and poor prognosis in colorectal cancer patients.                              | DOI:10.1038/s41598-017-05308-x                                                                      |
| Fjx1    | Fjx1 plays a role in cell signaling and development,                                                          | Fjx1 is a prognostic factor with a significant role in tumor immunity.                                                                        | doi: <a href="https://doi.org/10.3389/fonc.2023.1170482">10.3389/fonc.2023.1170482</a>              |

|         |                                                                                                                                                                            |                                                                                                                                  |                                                                                                           |
|---------|----------------------------------------------------------------------------------------------------------------------------------------------------------------------------|----------------------------------------------------------------------------------------------------------------------------------|-----------------------------------------------------------------------------------------------------------|
| Foxp1   | FOXP1 is a transcription factor belonging to the FOXP subfamily of the forkhead box (FOX) proteins.                                                                        | Foxp1 associated with reduced survival rates in CRC tissue                                                                       | doi: 10.1309/LM7IHV2 NJI1PHMXC.                                                                           |
| Has3    | The HAS3 gene encodes the protein Hyaluronan Synthase 3                                                                                                                    | HAS3 inhibition decreases subcutaneous tumor growth by colon cancer cells                                                        | doi: <a href="https://doi.org/10.2174/187152011796817655">10.2174/187152011796817655</a>                  |
| Il1r1   | Il1r1 encodes a cytokine receptor that belongs to the interleukin-1 receptor family                                                                                        | IL1R1-positive cancer-associated fibroblasts promote tumor progression and contribute to immunosuppression in colorectal cancer. | <a href="https://doi.org/10.1038/s41467-023-39953-w">https://doi.org/10.1038/s41467-023-39953-w</a>       |
| Itsn1   | ITSN1 acts as a guanine nucleotide exchange factor                                                                                                                         | Itsn1 is involved in breast cancer.                                                                                              | <a href="https://doi.org/10.1038/s41419-021-04218-1">https://doi.org/10.1038/s41419-021-04218-1</a>       |
| Klhdc4  | KLHDC4 encodes a kelch repeat-containing protein involved in cytoskeletal organization, cell proliferation, and apoptosis regulation.                                      | Upregulation of KLHDC4 Predicts a Poor Prognosis in Human Nasopharyngeal Carcinoma                                               | doi: <a href="https://doi.org/10.1371/journal.pone.0152820">10.1371/journal.pone.0152820</a>              |
| Meak7   | MEAK7 is a regulatory protein implicated in mTOR signaling                                                                                                                 | Meak7 can be target for cancer therapy.                                                                                          | <a href="https://doi.org/10.3389/fonc.2024.1375498">https://doi.org/10.3389/fonc.2024.1375498</a>         |
| Myo18a  | Myosin 18A is a protein that belongs to the unconventional myosin family                                                                                                   | Intratumor heterogeneity of MYO18A impact the clinical outcome of stage III Colorectal Cancer.                                   | doi: 10.3389/fonc.2020.588557.                                                                            |
| Olig3   | OLIG3 is a member of the basic helix-loop-helix (bHLH) transcription factor family                                                                                         | OLIG3 is involved in brain cancers.                                                                                              | doi: <a href="https://doi.org/10.3389/fnins.2023.1129434">10.3389/fnins.2023.1129434</a>                  |
| Pax1    | Pax1 regulates mesodermal development and skeletal patterning.                                                                                                             | Methylation of <i>PAX1/SOX1</i> , which may be new biomarkers for CRC screening.                                                 | doi: <a href="https://doi.org/10.2147/OTT.S143389">10.2147/OTT.S143389</a>                                |
| Prdm16  | PRDM16 ( <i>PR domain containing 16</i> ) is a transcriptional regulator that plays key roles in cell fate determination, metabolic regulation, and stem cell maintenance. | PRDM16 is suppressed in colorectal cancer due to DNA methylation.                                                                | <a href="https://doi.org/10.1016/j.cellsig.2025.111634">https://doi.org/10.1016/j.cellsig.2025.111634</a> |
| Pxn     | Pxn encodes a cytoskeletal protein involved in actin-membrane attachment                                                                                                   | paxillin increases metastasis and epithelial–mesenchymal transition in colorectal cancer                                         | doi: <a href="https://doi.org/10.3892/or.2020.7687">10.3892/or.2020.7687</a>                              |
| Rack1   | RACK1 is an insulin-like growth factor 1 (IGF-1) receptor-interacting protein                                                                                              | RACK1 acts as a potential tumor promoter in Colorectal Cancer.                                                                   | doi: <a href="https://doi.org/10.1155/2019/5625026">10.1155/2019/5625026</a>                              |
| Rxra    | RXRA is a protein that plays a crucial role in regulating gene expression.                                                                                                 | RXRA is a nuclear receptor with tumor-suppressive functions in colorectal cancer.                                                | doi: 10.1136/gut.2007.129858                                                                              |
| Slc37a1 | The SLC37A1 gene encodes a protein that acts as a glucose-                                                                                                                 | SLC37A1 is involved in the hematogenous metastasis of CRC.                                                                       | doi: <a href="https://doi.org/10.3892/ol.2017.7559">10.3892/ol.2017.7559</a>                              |

|         |                                                                                                                                    |                                                                                                                                    |                                                                                                         |
|---------|------------------------------------------------------------------------------------------------------------------------------------|------------------------------------------------------------------------------------------------------------------------------------|---------------------------------------------------------------------------------------------------------|
|         | 6-phosphate/phosphate antiporter.                                                                                                  |                                                                                                                                    |                                                                                                         |
| Sstr2   | The SSTR2 gene encodes the somatostatin receptor type 2, a protein involved in various physiological processes                     | SSTR2 is a potential therapeutic target for cancer                                                                                 | <a href="https://doi.org/10.3389/pore.2022.1610196">https://doi.org/10.3389/pore.2022.1610196</a>       |
| Tafa5   | Tafa5 is a chemokine-like family member.                                                                                           | TAFA5 promotes proliferation and migration in gastric cancer                                                                       | doi: <a href="https://doi.org/10.3892/mmr.2019.10724">10.3892/mmr.2019.10724</a>                        |
| Tmem72  | TMEM72 is predicted as a multi-pass transmembrane protein.                                                                         | TMEM72 is involved in normal kidney development and tumorigenesis in renal cell carcinoma.                                         | <a href="https://doi.org/10.1111/febs.16697">https://doi.org/10.1111/febs.16697</a>                     |
| Tnrc18  | TNRC18 is a poorly characterized gene.                                                                                             | TNRC18 is not associated with cancer.                                                                                              |                                                                                                         |
| Trak1   | TRAK1 gene encodes a kinesin adaptor protein that plays an important role in mitochondrial axonal transport,                       | MGb2-Ag/TRAK1 may play an important role in the development of CRC and may be a valuable prognostic indicator of CRC.              | doi: 10.1007/s00384-011-1237-1.                                                                         |
| Unc119  | UNC119 is a lipid-binding adaptor protein involved in intracellular trafficking, signal transduction, and immune cell function.    | UNC119 promotes hepatocellular carcinoma cell proliferation through Wnt/ $\beta$ -catenin signaling and predicts a poor prognosis. | doi: <a href="https://doi.org/10.1111/cas.13706">10.1111/cas.13706</a>                                  |
| Wasf3   | WASF3 is a key regulator of actin cytoskeleton remodeling and plays a significant role in cell migration, invasion, and metastasis | Wasf3 increases the CRC metastasis.                                                                                                | <a href="https://doi.org/10.32604/biocell.2022.018847">https://doi.org/10.32604/biocell.2022.018847</a> |
| Gm12830 | Predicted gene                                                                                                                     | Undefined.                                                                                                                         |                                                                                                         |
| Gm14216 | Predicted gene                                                                                                                     | Undefined.                                                                                                                         |                                                                                                         |
| Gm19183 | Predicted gene                                                                                                                     | Undefined.                                                                                                                         |                                                                                                         |
| Gm22645 | Predicted gene                                                                                                                     | Undefined.                                                                                                                         |                                                                                                         |
| Gm23326 | Predicted gene                                                                                                                     | Undefined.                                                                                                                         |                                                                                                         |
| Gm26815 | Predicted gene                                                                                                                     | Undefined.                                                                                                                         |                                                                                                         |
| Gm29441 | Predicted gene                                                                                                                     | Undefined.                                                                                                                         |                                                                                                         |
| Gm37516 | Predicted gene                                                                                                                     | Undefined.                                                                                                                         |                                                                                                         |
| Gm56103 | Predicted gene                                                                                                                     | Undefined.                                                                                                                         |                                                                                                         |
| Gm47071 | Predicted gene                                                                                                                     | Undefined.                                                                                                                         |                                                                                                         |
| Gm56573 | Predicted gene                                                                                                                     | Undefined.                                                                                                                         |                                                                                                         |
| Gm33321 | Predicted gene                                                                                                                     | Undefined.                                                                                                                         |                                                                                                         |
| Gm55248 | Predicted gene                                                                                                                     | Undefined.                                                                                                                         |                                                                                                         |
| Gm37191 | Predicted gene                                                                                                                     | Undefined.                                                                                                                         |                                                                                                         |
| Gm37491 | Predicted gene                                                                                                                     | Undefined.                                                                                                                         |                                                                                                         |
| Gm38414 | Predicted gene                                                                                                                     | Undefined.                                                                                                                         |                                                                                                         |
| Gm43784 | Predicted gene                                                                                                                     | Undefined.                                                                                                                         |                                                                                                         |
| Gm55346 | Predicted gene                                                                                                                     | Undefined.                                                                                                                         |                                                                                                         |
| Gm55867 | Predicted gene                                                                                                                     | Undefined.                                                                                                                         |                                                                                                         |
| Gm57154 | Predicted gene                                                                                                                     | Undefined.                                                                                                                         |                                                                                                         |
| Gm26971 | Predicted gene                                                                                                                     | Undefined.                                                                                                                         |                                                                                                         |

|                   |                |            |
|-------------------|----------------|------------|
| Gm55121           | Predicted gene | Undefined. |
| 9230111E<br>07Rik | lincRNA gene   | Undefined. |
| 5830428<br>M24Rik | lincRNA gene   | Undefined. |
| 9430087B<br>13Rik | lincRNA gene   | Undefined. |
| CJ186046<br>Rik   | lincRNA gene   | Undefined. |
