# Supplementary material for: Parvimonas micra alters gut microbiota and promotes tumor growth through DNA methylation
Source: Research Square preprint supplement (doi:10.21203/rs.3.rs-6977318/v1), 2025-08-25
Supplement: Supplementary file 3 [file 920d6edc39046ae400251f1b.pdf]

Table 3. List of hypomethylated and upregulated genes and their reported associations with colorectal cancer (CRC) or other cancer types.

| Gene     | role                                                                                                                                                                                                                                           | Linked to CRC or other cancers                                                                                                                       | Reference                                                                                           |
|----------|------------------------------------------------------------------------------------------------------------------------------------------------------------------------------------------------------------------------------------------------|------------------------------------------------------------------------------------------------------------------------------------------------------|-----------------------------------------------------------------------------------------------------|
| Slc39a14 | This gene encodes a member of the SLC39A family of divalent metal transporters that mediates the cellular uptake of manganese, zinc, iron, and cadmium.                                                                                        | The SLC39A14-exon4B transcript variant is a CRC biomarker with high sensitivity and organ-confined specificity.                                      | DOI: 10.1002/ijc.27399                                                                              |
| Map3k6   | <i>MAP3K6</i> (Mitogen-Activated Protein Kinase Kinase Kinase 6) is a gene that encodes a kinase enzyme involved in signaling pathways that regulate various cellular processes, including cell growth, survival, and response to stress.      | Germline mutations in <i>MAP3K6</i> are linked to familial gastric cancer                                                                            | doi: <a href="https://doi.org/10.1371/journal.pgen.1004669">10.1371/journal.pgen.1004669</a>        |
| Slc4a4   | <i>SLC4A4</i> (Solute Carrier Family 4 Member 4) encodes a sodium bicarbonate cotransporter, which plays an important role in regulating pH balance within cells and across tissues, particularly in the kidneys and other epithelial tissues. | <i>SLC4A4</i> may serve as a novel biomarker for predicting prognosis in patients with colon adenocarcinoma.                                         | doi: <a href="https://doi.org/10.12659/MSM.925016">10.12659/MSM.925016</a>                          |
| Arntl    | Arntl is a core component of the circadian clock machinery and plays a key role in regulating various physiological processes, including metabolic and immune functions.                                                                       | <i>BMAL1</i> (Arntl) is linked to bevacizumab resistance in colorectal cancer through the regulation of vascular endothelial growth factor A (VEGFA) | DOI: <a href="https://doi.org/10.1016/j.ebiom.2019.07.004">10.1016/j.ebiom.2019.07.004</a>          |
| Myo6     | <i>MYO6</i> (Myosin VI) is a motor protein that moves along actin filaments and plays critical roles in cellular processes such as endocytosis, secretion, and cell migration                                                                  | <i>Overexpression of myosin VI promotes the progression of gastric cancer cells.</i>                                                                 | <a href="https://doi.org/10.1016/j.gene.2016.08.015">https://doi.org/10.1016/j.gene.2016.08.015</a> |
| Matk     | <i>MATK</i> (Megakaryocyte-Associated Tyrosine Kinase), also known as <i>CHK</i> , is a member of the C-terminal Src kinase (CSK) family.                                                                                                      | <i>CSK-homologous kinase is a potential tumor suppressor gene in colorectal cancer, often epigenetically silenced through promoter methylation.</i>  | <a href="https://doi.org/10.1038/s41388-021-01755-z">https://doi.org/10.1038/s41388-021-01755-z</a> |

|          |                                                                                                                                                                                                             |                                                                                                                                                                                               |                                                                                                         |
|----------|-------------------------------------------------------------------------------------------------------------------------------------------------------------------------------------------------------------|-----------------------------------------------------------------------------------------------------------------------------------------------------------------------------------------------|---------------------------------------------------------------------------------------------------------|
| Pcyt1a   | <i>PCYT1A (Phosphate Cytidylyltransferase 1, Choline, Alpha) is a gene encoding an enzyme involved in the synthesis of phosphatidylcholine, a major phospholipid in cell membranes.</i>                     | <i>PCYT1A suppresses proliferation and migration via inhibiting mTORC1 pathway in lung adenocarcinoma</i>                                                                                     | doi: 10.1016/j.bbrc.2020.05.164.                                                                        |
| Cacna2d2 | <i>CACNA2D2 (Calcium Voltage-Gated Channel Auxiliary Subunit Alpha2delta 2) is a gene that encodes a subunit of voltage-gated calcium channels, which play a crucial role in calcium influx regulation.</i> | <i>CACNA2D2 is a tumor suppressor gene in several types of cancer including CRC.</i>                                                                                                          | doi: <a href="https://doi.org/10.18632/oncotarget.15815">10.18632/oncotarget.15815</a>                  |
| Bcas1    | <i>BCAS1 is a candidate oncogene, amplified in various human cancers, including breast and prostate cancer, leading to more aggressive tumors.</i>                                                          | <i>BCAS1 inhibits <math>\beta</math>-Arrestin 2, thereby promoting the proliferation and migration of glioblastoma cells.</i>                                                                 | <a href="https://doi.org/10.3390/cancers14163890">https://doi.org/10.3390/cancers14163890</a>           |
| Dll1     | <i>DLL1 (Delta-Like Ligand 1) is a ligand in the Notch signaling pathway, which is crucial for cell communication and regulates cell differentiation, proliferation, and apoptosis.</i>                     | <i>The Notch ligand DLL1 exhibits carcinogenic properties in human breast cancer cells.</i>                                                                                                   | doi: <a href="https://doi.org/10.1371/journal.pone.0217002">10.1371/journal.pone.0217002</a>            |
| Rxra     | <i>RXRA is a nuclear receptor regulates gene expression by binding to retinoic acid and other ligands. This gene controls processes related to cell growth, differentiation, apoptosis, and metabolism.</i> | <i>RXRA influences the development of metachronous colorectal neoplasia and may be particularly important in the formation of proximal lesions.</i>                                           | DOI: <a href="https://doi.org/10.1158/0008-5472.CAN-09-3264">10.1158/0008-5472.CAN-09-3264</a>          |
| Ada      | <i>Ada is an adenosine deaminase, which is essential for breaking down adenosine and deoxyadenosine in purine metabolism.</i>                                                                               | <i>Polymorphic sites in ADA may impact cell-mediated anti-tumor immune responses by regulating adenosine levels and affecting additional protein functions beyond its enzymatic activity.</i> | <a href="https://doi.org/10.3109/07357907.2010.483501">https://doi.org/10.3109/07357907.2010.483501</a> |
| Hnf4a    | <i>HNF4A is a nuclear transcription factor involved in regulating genes associated with metabolism, cell differentiation, and epithelial integrity.</i>                                                     | <i>In colorectal cancer, the transcription factor HNF4 has been associated with metastasis at both the RNA and protein levels.</i>                                                            | <a href="https://doi.org/10.1038/s41598-018-36168-8">https://doi.org/10.1038/s41598-018-36168-8</a>     |
| Dpep1    | <i>DPEP1 (Dipeptidase 1) is an enzyme primarily involved in the metabolism of dipeptides, particularly in the kidney, where it plays a role in breaking down certain peptides.</i>                          | <i>Dpep1 enhances the proliferation of colon cancer cells through regulation of the DPEP1/MYC feedback loop.</i>                                                                              | doi: 10.1016/j.bbrc.2020.08.063.                                                                        |

|               |                                                                                                                                                                                                                                             |                                                                                                                                                  |                                                                                                     |
|---------------|---------------------------------------------------------------------------------------------------------------------------------------------------------------------------------------------------------------------------------------------|--------------------------------------------------------------------------------------------------------------------------------------------------|-----------------------------------------------------------------------------------------------------|
| Hkdc1         | <i>HKDC1 (Hexokinase Domain Containing 1) is a member of the hexokinase family, enzymes that play an essential role in glycolysis by catalyzing the phosphorylation of glucose to glucose-6-phosphate.</i>                                  | <i>Upregulation of HKDC1 promotes glycolysis and disease progression in gastric cancer, while also conferring chemoresistance.</i>               | doi: <a href="https://doi.org/10.1111/cas.15692">10.1111/cas.15692</a>                              |
| Lrig3         | <i>LRIG3 is part of the LRIG family, known for regulating receptor tyrosine kinase signaling pathways, including the EGF receptor pathway.</i>                                                                                              | <i>LRIG3 may play a role in regulating EGF receptor signaling and act as a tumor suppressor gene in glioma pathogenesis.</i>                     | doi: <a href="https://doi.org/10.3389/fonc.2019.00447">10.3389/fonc.2019.00447</a>                  |
| Ace           | <i>ACE is a key enzyme in the renin-angiotensin system, primarily responsible for regulating blood pressure and fluid balance. ACE also influences cancer biology by promoting cell proliferation, angiogenesis, and tumor growth.</i>      | <i>Polymorphism in the angiotensin I-converting enzyme gene is associated with tumor size and patient survival in colorectal cancer.</i>         | doi: <a href="https://doi.org/10.1593/neo.07418">10.1593/neo.07418</a>                              |
| Fbp2          | <i>FBP2 (Fructose-1,6-Bisphosphatase 2) is an enzyme involved in gluconeogenesis, the metabolic pathway that generates glucose from non-carbohydrate sources</i>                                                                            | <i>Fbp2 inhibits sarcoma progression by restricting mitochondrial biogenesis.</i>                                                                | DOI: <a href="https://doi.org/10.1016/j.cmet.2019.10.012">10.1016/j.cmet.2019.10.012</a>            |
| Pitx1         | <i>PITX1 (Paired Like Homeodomain 1) is a transcription factor that plays an important role in regulating gene expression during development, particularly in limb and organ formation.</i>                                                 | <i>PITX1 plays a dual role in colon cancer, acting as both a tumor suppressor and an oncogene.</i>                                               | doi: <a href="https://doi.org/10.3389/fonc.2023.1253238">10.3389/fonc.2023.1253238</a>              |
| <i>lqgap2</i> | <i>Q motif-containing GTPase-activating protein 2 (IQGAP2) is a multidomain scaffolding protein that plays a significant role in various cellular processes, including cytoskeleton regulation, cell adhesion, and signal transduction.</i> | <i>lqgap2 mRNA serves as an independent prognostic marker and is associated with immunosuppression in diffuse large B-cell lymphoma (DLBCL).</i> | <a href="https://doi.org/10.1186/s12885-021-08086-y">https://doi.org/10.1186/s12885-021-08086-y</a> |
| Sema5a        | <i>SEMA5A (Semaphorin 5A) is a member of the semaphorin family of proteins, which are involved in various aspects of cellular signaling, particularly in the nervous system.</i>                                                            | <i>A combined expression signature of ULBP2 and SEMA5A serves as a prognostic and predictive biomarker for colon cancer.</i>                     | doi: <a href="https://doi.org/10.7150/jca.17872">10.7150/jca.17872</a>                              |

|                |                                                                                                                                                                                                                               |                                                                                                                                                                                                                      |                                                                                                     |
|----------------|-------------------------------------------------------------------------------------------------------------------------------------------------------------------------------------------------------------------------------|----------------------------------------------------------------------------------------------------------------------------------------------------------------------------------------------------------------------|-----------------------------------------------------------------------------------------------------|
| SLC38A4        | SLC38A4 (Solute Carrier Family 38 Member 4) is a member of the solute carrier (SLC) family of transport proteins, which are critical for the transport of various solutes across cell membranes.                              | <i>SLC38A4 can be used as a prognostic biomarker for colorectal cancer.</i>                                                                                                                                          | DOI: 10.1016/j.heliyon.2024.e34464                                                                  |
| Cdx1           | CDX1 (Caudal Type Homeobox 1) is a critical transcription factor for maintaining the identity and function of intestinal epithelial cells.                                                                                    | <i>Cdx1 overexpression could increase malignancy in early stages of tumourigenesis.</i>                                                                                                                              | <a href="https://doi.org/10.1038/onc.2008.78">https://doi.org/10.1038/onc.2008.78</a>               |
| <i>Aldh1</i>   | ALDH1 (Aldehyde Dehydrogenase 1) is an enzyme that plays a crucial role in the metabolism of aldehydes, particularly in the conversion of aldehydes to their corresponding carboxylic acids.                                  | <i>Aldh1 could be a potential diagnostic and therapeutic target for colon cancer stem cells (CSCs).</i>                                                                                                              | <a href="https://doi.org/10.3389/fonc.2022.1026278">https://doi.org/10.3389/fonc.2022.1026278</a>   |
| <i>Pfkfb4</i>  | Pfkfb4 (6-Phosphofructo-2-kinase/fructose-2,6-bisphosphatase 4) is an enzyme that plays a significant role in regulating glucose metabolism and energy homeostasis.                                                           | <i>High PFKFB4 expression was associated with both improved overall survival (OS) and post-progression survival (PPS) in Colon adenocarcinoma patients.</i>                                                          | <a href="https://doi.org/10.1038/s41598-023-43619-4">https://doi.org/10.1038/s41598-023-43619-4</a> |
| <i>Mgat4a</i>  | MGAT4A (Mannosyl (alpha-1,3-)-glycoprotein beta-1,4-N-acetylglucosaminyltransferase A) is an enzyme involved in glycoprotein biosynthesis.                                                                                    | <i>Aberrant expression of MGAT4A mRNA has been observed in various cancer cells and is known to enhance their invasiveness by modulating the functions of glycoproteins, including integrin <math>\beta</math>1.</i> | <a href="https://doi.org/10.1038/s42003-022-03661-w">https://doi.org/10.1038/s42003-022-03661-w</a> |
| <i>Aldh9a1</i> | ALDH9A1 (Aldehyde Dehydrogenase 9 Family Member A1) is an enzyme that plays a crucial role in the metabolism of aldehydes, particularly in the detoxification of harmful substances and the regulation of cellular processes. | <i>The abundance of ALDH9A1, is elevated in renal cell carcinoma (RCC).</i>                                                                                                                                          | <a href="https://doi.org/10.1074/mcp.M800252-MCP200">https://doi.org/10.1074/mcp.M800252-MCP200</a> |
| <i>Chmp4c</i>  | <i>Chmp4c</i> (Charged Multivesicular Body Protein 4C) is a member of the CHMP family of proteins, which are involved in the endosomal sorting complex required for transport (ESCRT) machinery.                              | <i>Chmp4c plays a role in the viability and motility of cervical cancer (CC) cells by regulating epithelial-mesenchymal transition, potentially aiding in the discovery of novel biomarkers for CC therapy.</i>      | doi: <a href="https://doi.org/10.1002/2211-5463.12880">10.1002/2211-5463.12880</a>                  |

|                |                                                                                                                                                                                                                                     |                                                                                                                                                                                                               |                                                                                                          |
|----------------|-------------------------------------------------------------------------------------------------------------------------------------------------------------------------------------------------------------------------------------|---------------------------------------------------------------------------------------------------------------------------------------------------------------------------------------------------------------|----------------------------------------------------------------------------------------------------------|
| <i>EPB41L1</i> | <i>EPB41L1 (Erythrocyte Membrane Protein Band 4.1 Like 1) is a member of the band 4.1 family of proteins, which are known for their roles in maintaining the integrity and stability of the cytoskeleton in various cell types.</i> | <i>EPB41L1 is significantly upregulated in colorectal adenocarcinoma tissues, and its high expression level is associated with a poor prognosis for the patients.</i>                                         | DOI: <a href="https://doi.org/10.21203/rs.3.rs-358130/v1">https://doi.org/10.21203/rs.3.rs-358130/v1</a> |
| <i>SNX7</i>    | <i>SNX7 (Sorting Nexin 7) is a member of the sorting nexin family of proteins, which are involved in intracellular trafficking and membrane dynamics.</i>                                                                           | <i>SNX7 is emerging as a promising novel biomarker for the diagnosis, prognosis, and prediction of treatment responses to chemotherapy and immunotherapy in patients with hepatocellular carcinoma (HCC).</i> | doi: <a href="https://doi.org/10.1186/s12885-023-11405-0">10.1186/s12885-023-11405-0</a>                 |
| <i>Coro2a</i>  | <i>CORO2A (Coronin 2A) is a protein that plays a role in the regulation of the actin cytoskeleton and is involved in various cellular processes.</i>                                                                                | <i>CORO2A has the potential to serve as a prognostic predictor for patients with triple-negative breast cancer (TNBC).</i>                                                                                    | doi: <a href="https://doi.org/10.3389/fonc.2020.00916">10.3389/fonc.2020.00916</a>                       |
| <i>Dab1</i>    | <i>DAB1 (Disabled 1) is a protein that plays a critical role in various cellular signaling pathways, particularly in neuronal development and migration.</i>                                                                        | <i>Genetic depletion of DAB1 inhibits cancer invasion and metastasis in mice with activated NOTCH signaling.</i>                                                                                              | DOI: <a href="https://doi.org/10.1158/2159-8290.CD-14-0595">10.1158/2159-8290.CD-14-0595</a>             |
| <i>Rbp7</i>    | <i>RBP7 (RNA Binding Protein 7) is a protein involved in various cellular processes, particularly in RNA metabolism and gene regulation.</i>                                                                                        | <i>RBP7 is a robust prognostic biomarker in colon cancer and functionally contributes to the malignant characteristics of colon cancer cells.</i>                                                             | doi: <a href="https://doi.org/10.7150/jca.35180">10.7150/jca.35180</a>                                   |
| <i>Ugdh</i>    | <i>UGDH (UDP-glucuronic acid decarboxylase) is an enzyme involved in the metabolism of carbohydrates and the detoxification of various compounds in the body.</i>                                                                   | <i>UGDH is an enzyme that could be utilized as a potential prognostic marker in oncology and as a therapeutic target in cancer biology.</i>                                                                   | doi: <a href="https://doi.org/10.18632/oncotarget.28514">10.18632/oncotarget.28514</a>                   |
| <i>Tpk1</i>    | <i>TPK1 (Thiamine Phosphate Kinase 1) is an enzyme involved in thiamine metabolism and plays a crucial role in the synthesis of thiamine diphosphate.</i>                                                                           | <i>TPK1 expression is a significant factor influencing the susceptibility of cancer cells to ionizing radiation.</i>                                                                                          | <a href="https://doi.org/10.18632">https://doi.org/10.18632</a>                                          |
| <i>Gfpt1</i>   | <i>GFPT1 (Glutamine-Fructose-6-Phosphate Transaminase 1) is an enzyme that plays a key role in amino acid and carbohydrate metabolism.</i>                                                                                          | <i>The enhanced levels of Gfpt1 promotes the growth of colorectal cancer.</i>                                                                                                                                 | doi: <a href="https://doi.org/10.3390/ijms25094883">10.3390/ijms25094883</a> .                           |

|                |                                                                                                                                                                                                                                             |                                                                                                                                                                                             |                                                                                                     |
|----------------|---------------------------------------------------------------------------------------------------------------------------------------------------------------------------------------------------------------------------------------------|---------------------------------------------------------------------------------------------------------------------------------------------------------------------------------------------|-----------------------------------------------------------------------------------------------------|
| <i>Nadsyn1</i> | NADSYN1 (NAD synthetase 1) is an enzyme that catalyzes the final step in the biosynthesis of nicotinamide adenine dinucleotide (NAD+)                                                                                                       | The DNA copy number of Nadsyn1 was found to be elevated in several cancer types, including prostate, ovarian, and pancreatic cancers.                                                       | doi: <a href="https://doi.org/10.1038/s41586-019-1150-2">10.1038/s41586-019-1150-2</a>              |
| <i>Lrrc1</i>   | The LRRC1 gene has the potential to function as an immune-associated prognostic biomarker for hepatocellular carcinoma (HCC).                                                                                                               | The LRRC1 gene has the potential to function as an immune-associated prognostic biomarker for HCC.                                                                                          | doi: <a href="https://doi.org/10.1097/MD.00000000000034365">10.1097/MD.00000000000034365</a>        |
| <i>Car12</i>   | CAR12 (Carbonic Anhydrase 12) is an enzyme that catalyzes the reversible hydration of carbon dioxide to bicarbonate and a proton, playing a crucial role in maintaining acid-base balance and facilitating various physiological processes. | Car12 is upregulated in human as well as murine breast cancer tissue.                                                                                                                       | <a href="https://doi.org/10.1186/s13058-023-01644-1">https://doi.org/10.1186/s13058-023-01644-1</a> |
| <i>Mst1r</i>   | MST1R (Macrophage Stimulating 1 Receptor) or RON, is a receptor tyrosine kinase involved in various cellular processes.                                                                                                                     | RON plays a role in carcinogenesis through its immune modulation of the tumor microenvironment, activation of various oncogenic pathways, and protective functions under cellular stress.   | doi: <a href="https://doi.org/10.3390/cancers14082037">10.3390/cancers14082037</a>                  |
| <i>Tspan8</i>  | Tetraspanin 8 (TSPAN8) is a member of the tetraspanin family, characterized by four transmembrane domains and involvement in various cellular processes.                                                                                    | TSPAN8 enhances the stemness of cancer cells through the activation of sonic Hedgehog signaling.                                                                                            | <a href="https://doi.org/10.1038/s41467-019-10739-3">https://doi.org/10.1038/s41467-019-10739-3</a> |
| <i>Cellf5</i>  | CELF (CUGBP Elav-like family) proteins are RBPs (RNA-binding proteins) with pleiotropic capabilities in RNA processing.                                                                                                                     | Members of the CELF family have been linked to widespread changes in cancer proliferation and invasion, resulting in their identification as potential tumor suppressors or even oncogenes. | doi: <a href="https://doi.org/10.3390/ijms222011056">10.3390/ijms222011056</a>                      |
| <i>Dpp4</i>    | Dipeptidyl peptidase-4 (DPP-4), also known as CD26, is a multifunctional enzyme involved in various physiological processes.                                                                                                                | DPP-4 inhibitors enhance the incidence of newly developed metastasis in primary thyroid cancer among diabetic patients.                                                                     | doi: 10.1002/ijc.31870.                                                                             |

|                 |                                                                                                                                                                                 |                                                                                                                                                                  |                                                                                                         |
|-----------------|---------------------------------------------------------------------------------------------------------------------------------------------------------------------------------|------------------------------------------------------------------------------------------------------------------------------------------------------------------|---------------------------------------------------------------------------------------------------------|
| <i>Slc12a8</i>  | SLC12A8 (Solute Carrier Family 12 Member 8) is a protein-coding gene that encodes a cation-chloride cotransporter.                                                              | The upregulation of SLC12A8 promoted resistance to apoptosis, EMT, and reduced reactive oxygen species (ROS) production.                                         | doi: <a href="https://doi.org/10.21037/tcr-24-87">10.21037/tcr-24-87</a>                                |
| <i>Aldh1b1</i>  | Aldehyde dehydrogenase 1B1 (ALDH1B1) is an enzyme that plays a crucial role in the metabolism of aldehydes, particularly in the detoxification of alcohol-derived acetaldehyde. | ALDH1B1 is significantly upregulated in colorectal adenocarcinoma, and silencing ALDH1B1 inhibits the growth of human colon cancer spheroids and xenografts.     | <a href="https://doi.org/10.1371/journal.pone.0121648">https://doi.org/10.1371/journal.pone.0121648</a> |
| <i>Krt20</i>    | Keratin 20 (KRT20) is a type I intermediate filament protein predominantly expressed in the gastrointestinal epithelium, including the colon.                                   | Colorectal cancer cells typically exhibit high levels of keratin 20 (K20) expression                                                                             | DOI: <a href="https://doi.org/10.14670/HH-27.347">10.14670/HH-27.347</a>                                |
| <i>Chst4</i>    | Carbohydrate sulfotransferase 4 (CHST4) is an enzyme that catalyzes the transfer of sulfate groups to specific carbohydrate structures                                          | CHST4 functions as a tumor suppressor in hepatocellular carcinoma associated with hepatitis B virus (HCC-HBV).                                                   | doi: <a href="https://doi.org/10.3389/fonc.2020.554331">10.3389/fonc.2020.554331</a>                    |
| <i>Sec24a</i>   | SEC24A (SEC24 Homolog A) is a protein that plays a crucial role in the transport of proteins from the endoplasmic reticulum (ER) to the Golgi apparatus.                        | SEC24A is involved in enhancing the invasion and metastasis of human gastric cancer (GC) cells.                                                                  | PMCID: PMC6962814 PMID: <a href="https://pubmed.ncbi.nlm.nih.gov/31949794/">31949794</a>                |
| <i>Arhgap26</i> | ARHGAP26 (Rho GTPase-activating protein 26) is an enzyme that regulates the activity of Rho GTPases                                                                             | The recurrent RhoGAP gene fusion CLDN18-ARHGAP26 enhances RHOA activation and stimulates focal adhesion kinase and YAP-TEAD signaling in diffuse gastric cancer. | <a href="https://doi.org/10.1136/gutjnl-2023-329686">https://doi.org/ 10.1136/gutjnl-2023-329686</a>    |
| <i>Aff3</i>     | AFF3 (AF4/FMR2 family member 3) is a gene encoding a nuclear transcriptional activator involved in RNA elongation and gene expression regulation.                               | AFF3 may be a promising potential marker for the diagnosis and prognosis of GC patients.                                                                         | doi: <a href="https://doi.org/10.1002/jcla.24437">10.1002/jcla.24437</a>                                |
| <i>Rgs22</i>    | Regulator of G-protein signaling 22 (RGS22) is a protein that modulates G-protein signaling pathways                                                                            | RGS22 is overexpressed in low-metastatic epithelial cancers and plays a role in cell migration and invasion processes in esophageal cancer cell lines.           | DOI: <a href="https://doi.org/10.1007/s10585-011-9390-z">10.1007/s10585-011-9390-z</a>                  |

|               |                                                                                                                                                                                                                                            |                                                                                                                                                                                                                    |                                                                                                   |
|---------------|--------------------------------------------------------------------------------------------------------------------------------------------------------------------------------------------------------------------------------------------|--------------------------------------------------------------------------------------------------------------------------------------------------------------------------------------------------------------------|---------------------------------------------------------------------------------------------------|
| <i>Kctd12</i> | KCTD12 (Potassium Channel Tetramerization Domain Containing 12) is a protein-coding gene involved in various cellular processes, including the regulation of GABA-B receptor signaling and potential roles in cancer progression.          | KCTD12 is a novel regulator of colorectal cancer (CRC) cell stemness and may act as a promising prognostic marker and therapeutic target for CRC patients.                                                         | <a href="https://doi.org/10.1038/srep20460">https://doi.org/10.1038/srep20460</a>                 |
| <i>Fyb2</i>   | FYB2, also known as FYN binding protein 2, is an adaptor protein involved in T-cell receptor (TCR)-mediated activation of signaling pathways.                                                                                              | FYB2 may serve as a novel prognostic biomarker in liver hepatocellular carcinoma (LIHC)                                                                                                                            | <a href="https://doi.org/10.3390/livers2040027">https://doi.org/10.3390/livers2040027</a>         |
| <i>Ighg3</i>  | IGHG3 contributes to the structure of IgG3 antibodies, which are crucial for immune defense against pathogens.                                                                                                                             | Ighg3 is overexpressed in non-small cell lung carcinoma.                                                                                                                                                           | doi: 10.3892/ijo.26.1.247.                                                                        |
| <i>Frat1</i>  | FRAT1 (FRAT Regulator of WNT Signaling Pathway 1) is a protein-coding gene that plays a pivotal role in the Wnt signaling pathway, which is essential for regulating cell proliferation, differentiation, and survival.                    | Knocking out the FRAT1 gene reduces the expression of $\beta$ -catenin, cyclin D1, and c-myc in liver cancer cells, inhibiting tumor cell proliferation by modulating the Wnt/ $\beta$ -catenin signaling pathway. | doi: 10.3892/or.2016.5130.                                                                        |
| <i>Rnase1</i> | RNase L is activated by 2-5A molecules, which are synthesized in response to viral infections.                                                                                                                                             | RNase L is a crucial element in interferon (IFN)-mediated antiviral signaling and has demonstrated antitumor effects in cancer.                                                                                    | <a href="https://doi.org/10.1038/s41419-019-1902-9">https://doi.org/10.1038/s41419-019-1902-9</a> |
| <i>Syne2</i>  | SYNE2 (Spectrin Repeat Containing Nuclear Envelope Protein 2), also known as Nesprin-2, is a protein that plays a crucial role in maintaining the structural integrity of the nucleus by anchoring it to the actin cytoskeleton.           | SYNE2 plays a significant role in the regulation of p21 and is associated with the clinical outcomes of HBV-related hepatocellular carcinoma (HCC) in a TP53-independent manner.                                   | <a href="https://doi.org/10.1038/srep31237">https://doi.org/10.1038/srep31237</a>                 |
| <i>Kalrn</i>  | Kalirin (KALRN) is a gene encoding a protein that functions as a Rho guanine nucleotide exchange factor (RhoGEF), playing a pivotal role in regulating the actin cytoskeleton and influencing neuronal development and synaptic plasticity | The KALRN mutation serves as a valuable biomarker for predicting patients' responses to immunotherapy in cancer.                                                                                                   | doi: <a href="https://doi.org/10.1136/jitc-2019-000293">10.1136/jitc-2019-000293</a>              |



|                 |                                                                                                                                                                                                                                                |                                                                                                                                                     |                                                                                                   |
|-----------------|------------------------------------------------------------------------------------------------------------------------------------------------------------------------------------------------------------------------------------------------|-----------------------------------------------------------------------------------------------------------------------------------------------------|---------------------------------------------------------------------------------------------------|
| <i>Nptx2</i>    | Neuronal Pentraxin 2 (NPTX2) is a protein involved in synaptic function and plasticity within the central nervous system.                                                                                                                      | NPTX2 enhances the growth of colorectal cancer and liver metastasis through the activation of the canonical Wnt/ $\beta$ -catenin pathway via FZD6. | <a href="https://doi.org/10.1038/s41419-019-1467-7">https://doi.org/10.1038/s41419-019-1467-7</a> |
| <i>Itpk1</i>    | Inositol-tetrakisphosphate 1-kinase (ITPK1) is an enzyme that plays a crucial role in inositol phosphate signaling pathways, which are essential for various cellular processes, including cell proliferation, differentiation, and apoptosis. | ITPK1 enhances the sensitivity of tumor cells to IgA-dependent neutrophil-mediated killing in vivo.                                                 | doi: 10.4049/jimmunol.2300372.                                                                    |
| <i>Sh3rf2</i>   | SH3RF2 (SH3 Domain Containing Ring Finger 2) is a protein-coding gene that encodes an E3 ubiquitin-protein ligase involved in various cellular processes, including apoptosis regulation and protein stability.                                | SH3RF2 acts as an oncogene by regulating the stability of the PAK4 protein.                                                                         | doi: 10.1093/carcin/bgt338.                                                                       |
| <i>Naaladl1</i> | NAALADL1 (N-acetylated alpha-linked acidic dipeptidase-like 1) is a protein-coding gene that encodes an aminopeptidase enzyme involved in peptide catabolism.                                                                                  | NAALADL1 gene expression is low in typical prostate cancer cell lines but is elevated in the human medullary thyroid carcinoma TT cell line.        | doi: <a href="https://doi.org/10.1073/pnas.2025710119">10.1073/pnas.2025710119</a>                |
| <i>Clrn3</i>    | CLRN3 (Clarín 3) is a protein-coding gene located on chromosome 10, known for its involvement in lysosomal function and cellular processes.                                                                                                    | CLRN3 significantly reduced the malignant biological behavior of colorectal cancer (CRC) cells                                                      | <a href="https://doi.org/10.3390/biom14080891">https://doi.org/10.3390/biom14080891</a>           |
| <i>Pls1</i>     | Plastin 1, also known as I-plastin or fimbrin, is an actin-bundling protein encoded by the PLS1 gene.                                                                                                                                          | Plastin 1 promotes the metastasis of colorectal cancer by activating the IQGAP1/Rac1/ERK pathway.                                                   | doi: <a href="https://doi.org/10.1111/cas.14438">10.1111/cas.14438</a>                            |
| <i>Fcgbp</i>    | FCGBP (Fc gamma binding protein) is a protein involved in mucosal immunity and has been implicated in various cancers.                                                                                                                         | FCGBP is a prognostic biomarker that is associated with immune infiltration in glioma.                                                              | <a href="https://doi.org/10.3389/fonc.2021.769033">https://doi.org/10.3389/fonc.2021.769033</a>   |
| <i>Liph</i>     | Lipase H (LIPH) is a membrane-bound enzyme that catalyzes the production of 2-acyl lysophosphatidic acid (LPA), a                                                                                                                              | LIPH (lipase H) is significantly overexpressed in breast cancer tissues and is associated with poorer prognoses in breast cancer.                   | doi: <a href="https://doi.org/10.2147/IJGM.S332233">10.2147/IJGM.S332233</a>                      |

|                                    |                                                                                                                                                                                                                     |                                                                                                                                                                              |                                                                                                         |
|------------------------------------|---------------------------------------------------------------------------------------------------------------------------------------------------------------------------------------------------------------------|------------------------------------------------------------------------------------------------------------------------------------------------------------------------------|---------------------------------------------------------------------------------------------------------|
|                                    | bioactive lipid mediator involved in various physiological processes.                                                                                                                                               |                                                                                                                                                                              |                                                                                                         |
| <i>GPR133</i><br>( <i>ADGRD1</i> ) | GPR133, also known as ADGRD1, is an adhesion G protein-coupled receptor (aGPCR) involved in various cellular processes, including tumor progression.                                                                | GPR133 is a key mediator of the hypoxic response in glioblastoma (GBM) and plays significant protumorigenic roles.                                                           | <a href="https://doi.org/10.1038/oncsis.2016.63">https://doi.org/10.1038/oncsis.2016.63</a>             |
| <i>Dcst1</i>                       | DCST1 (DC-STAMP Domain Containing 1) is a protein-coding gene that encodes a protein involved in various cellular processes, including immune response and cell signaling.                                          | DCST1-AS1 enhances TGF- $\beta$ -induced epithelial-mesenchymal transition and increases chemoresistance in triple-negative breast cancer cells through the action of ANXA1. | doi: <a href="https://doi.org/10.3389/fonc.2020.00280">10.3389/fonc.2020.00280</a>                      |
| <i>Gucy2c</i>                      | Guanylate cyclase 2C (GUCY2C) functions as a receptor for endogenous peptides such as guanylin and uroguanylin, as well as for heat-stable enterotoxins produced by certain pathogens.                              | GUCY2C is a promising target for immunotherapy and serves as a diagnostic marker for both primary and metastatic disease.                                                    | doi: <a href="https://doi.org/10.1080/14728222.2021.1937124">10.1080/14728222.2021.1937124</a>          |
| <i>Fcmr</i>                        | The FCMR gene encodes the Fc mu receptor, a protein that binds to the Fc region of immunoglobulin M (IgM) antibodies.                                                                                               | Therapeutically targeting Fcmr during oncogenesis reduced tumor growth, whether used alone or in combination with anti-PD-1.                                                 | <a href="https://doi.org/10.1038/s41467-019-10619-w">https://doi.org/10.1038/s41467-019-10619-w</a>     |
| <i>Tnfrsf14</i>                    | TNFRSF14, also known as Herpesvirus Entry Mediator (HVEM), is a member of the tumor necrosis factor (TNF) receptor superfamily.                                                                                     | TNFRSF14 (HVEM) is a promising new immune checkpoint for cancer immunotherapy in humanized mice.                                                                             | <a href="https://doi.org/10.1101/711119">https://doi.org/10.1101/711119</a>                             |
| <i>Dao</i>                         | Diamine oxidase (DAO), also known as amine oxidase, copper-containing 1 (AOC1), is an enzyme responsible for the oxidative deamination of biogenic amines, including histamine, putrescine, and spermidine.         | Plasma diamine oxidase activity serves as a biomarker for assessing gastrointestinal tract toxicities in gastric cancer patients undergoing chemotherapy.                    | <a href="https://doi.org/10.1159/000336799">https://doi.org/10.1159/000336799</a>                       |
| <i>Sytl3</i>                       | Synaptotagmin-like 3 (SYTL3) acts as a peripheral membrane protein that interacts with RAB27A and is involved in the process of vesicular trafficking, facilitating the transport and release of cellular vesicles. | SYTL3 functions as a regulator of cortical neuronal migration in the developing brains of both humans and mice.                                                              | <a href="https://doi.org/10.1016/j.celrep.2021.108802">https://doi.org/10.1016/j.celrep.2021.108802</a> |

|                 |                                                                                                                                                                                                                  |                                                                                                                                                                                                                       |                                                                                                               |
|-----------------|------------------------------------------------------------------------------------------------------------------------------------------------------------------------------------------------------------------|-----------------------------------------------------------------------------------------------------------------------------------------------------------------------------------------------------------------------|---------------------------------------------------------------------------------------------------------------|
| <i>Ak7</i>      | Adenylate kinase 7 (AK7) catalyzes the reversible phosphorylation of adenine nucleotides, playing a crucial role in maintaining cellular energy homeostasis.                                                     | Adenylate kinase 7 serves as a prognostic indicator for overall survival in ovarian cancer.                                                                                                                           | doi: <a href="https://doi.org/10.1097/MD.00000000000024134">10.1097/MD.00000000000024134</a>                  |
| <i>Bach2</i>    | BACH2 (BTB Domain And CNC Homolog 2) is a transcription factor that plays a pivotal role in regulating immune responses and has been implicated in various cancers.                                              | The transcription factor BACH2 facilitates tumor immunosuppression.                                                                                                                                                   | DOI: <a href="https://doi.org/10.1172/JCI82884">10.1172/JCI82884</a>                                          |
| <i>Abcc8</i>    | ABCC8, known as ATP-binding cassette sub-family C member 8, encodes the sulfonylurea receptor 1 (SUR1) protein, a subunit of the ATP-sensitive potassium (K-ATP) channel.                                        | ABCC8 mRNA expression may serve as an independent prognostic indicator for glioma patients and could predict their sensitivity to temozolomide treatment.                                                             | doi: <a href="https://doi.org/10.1038/s41598-020-69676-7">10.1038/s41598-020-69676-7</a>                      |
| <i>Anpep</i>    | ANPEP, also known as alanyl aminopeptidase, is a membrane-bound enzyme plays a crucial role in peptide digestion and metabolism.                                                                                 | ANPEP is a macrophage-related gene that may play a significant role in tumor metabolism.                                                                                                                              | <a href="https://doi.org/10.1158/1538-7755.DISP21-PO-153">https://doi.org/10.1158/1538-7755.DISP21-PO-153</a> |
| <i>Rap1gap2</i> | Rap1GAP2 (Rap1 GTPase-activating protein 2) functions as a GTPase-activating protein (GAP) for Rap1, a small GTPase involved in regulating cell adhesion, migration, and proliferation.                          | Rap1GAP may play a role in tumor progression in colorectal cancer (CRC) and could serve as a potential target for prognostic prediction in CRC patients.                                                              | <a href="https://doi.org/10.3892/ot.2018.8305">https://doi.org/10.3892/ot.2018.8305</a>                       |
| <i>Dgki</i>     | Diacylglycerol kinase iota (DGKI) is part of the type IV diacylglycerol kinase subfamily which plays a crucial role in regulating intracellular levels of diacylglycerol (DAG) and phosphatidic acid (PA)        | DGKI overexpression may serve as a potential molecular marker for poor prognosis in gastric cancer (GC), with the MAPK signaling pathway identified as a key pathway associated with DGKI regulation in this context. | <a href="https://doi.org/10.3389/fmed.2020.00320">https://doi.org/10.3389/fmed.2020.00320</a>                 |
| <i>Nos1ap</i>   | Nitric oxide synthase 1 adaptor protein (NOS1AP), functions as an adaptor protein that interacts with neuronal nitric oxide synthase (nNOS), playing a crucial role in neuronal signaling and synaptic function. | A protein complex consisting of SCRIB, NOS1AP, and VANG1 regulates cell polarity and migration and is linked to the progression of breast cancer.                                                                     | DOI: <a href="https://doi.org/10.1038/onc.2011.528">10.1038/onc.2011.528</a>                                  |
| <i>Trpm4</i>    | Transient Receptor Potential Melastatin 4 (TRPM4) is a calcium-activated, non-selective cation channel that allows the influx of monovalent cations, such as                                                     | TRPM4 is significantly expressed in human colorectal tumor buds and plays a role in the proliferation, cell cycle                                                                                                     | <a href="https://doi.org/10.1002/1878-0261.12566">https://doi.org/10.1002/1878-0261.12566</a>                 |

|                 |                                                                                                                                                                                                                |                                                                                                                                      |                                                                                                     |
|-----------------|----------------------------------------------------------------------------------------------------------------------------------------------------------------------------------------------------------------|--------------------------------------------------------------------------------------------------------------------------------------|-----------------------------------------------------------------------------------------------------|
|                 | sodium and potassium, while being impermeable to calcium.                                                                                                                                                      | regulation, and invasion of colorectal cancer cells.                                                                                 |                                                                                                     |
| <i>Slc43a2</i>  | SLC43A2, is a protein that functions as a transporter for large neutral amino acids, including methionine. It plays a crucial role in cellular amino acid uptake, influencing various metabolic processes.     | SLC43A2 has been identified as an oncogene that regulates methionine metabolism and tumor proliferation across various cancer types. | doi: 10.1038/s41586-020-2682-1.                                                                     |
| <i>Atp6v0a2</i> | ATP6V0A2, is a component of the vacuolar-type H <sup>+</sup> -ATPase (V-ATPase) complex, which is responsible for acidifying intracellular compartments such as endosomes, lysosomes, and the Golgi apparatus. | The ATP6V0A2 subunit is overexpressed in ovarian cancer and is linked to cell membrane dynamics that drive metastasis.               | <a href="https://doi.org/10.1038/s41419-021-04495-w">https://doi.org/10.1038/s41419-021-04495-w</a> |
| <i>A4gnt</i>    | Alpha-1,4-N-acetylglucosaminyltransferase (A4GNT) is an enzyme responsible for adding N-acetylglucosamine (GlcNAc) to glycoproteins, a modification that influences protein function and stability.            | A4gnt knockout mice, the absence of αGlcNAc in gland mucin leads to the development of gastric adenocarcinoma.                       | doi: <a href="https://doi.org/10.1111/cas.12305">10.1111/cas.12305</a>                              |
| <i>Crybg2</i>   | Crystallin beta-gamma domain-containing protein 2 is predicted to possess carbohydrate binding activity.                                                                                                       | <i>The association of Crybg2 with colon cancer has not yet been elucidated.</i>                                                      | <a href="https://www.ncbi.nlm.nih.gov/gene/55057">https://www.ncbi.nlm.nih.gov/gene/55057</a>       |
| <i>Slc5a4b</i>  | Predicted to facilitate low-affinity D-glucose symporter activity, function upstream of or within proton transmembrane transport.                                                                              | <i>The association of Slc5a4b with colon cancer has not yet been elucidated.</i>                                                     | <a href="https://www.ncbi.nlm.nih.gov/gene/6527">https://www.ncbi.nlm.nih.gov/gene/6527</a>         |
| <i>Slc4a8</i>   | t <i>Slc4a8</i> transports sodium and bicarbonate ions across cell membranes                                                                                                                                   | <i>The association of Slc4a8 with colon cancer has not yet been elucidated.</i>                                                      | <a href="https://doi.org/10.1016/j.mam.2012.07.009">https://doi.org/10.1016/j.mam.2012.07.009</a>   |
| <i>Myo7b</i>    | Myo7b, or myosin VIIb, is a protein found in the brush border microvilli of epithelial cells in the colon and kidneys                                                                                          | <i>The association of Myo7b with colon cancer has not yet been elucidated.</i>                                                       | doi: <a href="https://doi.org/10.1016/j.cub.2016.08.014">10.1016/j.cub.2016.08.014</a>              |

|                      |                                                                                                                                                                                                                        |                                                                                                                                                                                                             |                                                                                                                                 |
|----------------------|------------------------------------------------------------------------------------------------------------------------------------------------------------------------------------------------------------------------|-------------------------------------------------------------------------------------------------------------------------------------------------------------------------------------------------------------|---------------------------------------------------------------------------------------------------------------------------------|
| <i>Epb41l4b</i>      | PB41L4B (erythrocyte membrane protein band 4.1 like 4B) is a gene that encodes a protein involved in regulating the circumferential actomyosin belt in epithelial cells.                                               | <i>Epb41l4b</i> is downregulated in CRC.                                                                                                                                                                    | doi: <a href="https://doi.org/10.1042/BSR20200141">10.1042/BSR20200141</a>                                                      |
| <i>Espn</i>          | Espin (encoded by the ESPN gene) is a multifunctional actin-bundling protein crucial for the organization and function of actin filament-rich structures, such as microvilli in mechanosensory and chemosensory cells. | High expression levels of ESPN are independently linked to a poor prognosis in patients with esophageal squamous cell carcinoma (ESCC), while the downregulation of ESPN inhibits the growth of ESCC cells. | <a href="https://doi.org/10.1186/s12935-018-0713-x">https://doi.org/10.1186/s12935-018-0713-x</a>                               |
| <i>Shroom3</i>       | SHROOM3, a gene linked to chronic kidney disease, influences the structure of podocytes.                                                                                                                               | <i>The association of Shroom3 with colon cancer has not yet been elucidated.</i>                                                                                                                            | <a href="https://doi.org/10.1038/s41598-020-77952-9">https://doi.org/10.1038/s41598-020-77952-9</a>                             |
| <i>Atp2b2</i>        | ATP2B2, also known as plasma membrane calcium-transporting ATPase 2 (PMCA2), is a gene encoding a protein responsible for regulating calcium ion concentrations within cells.                                          | <i>The association of Atp2b2 with colon cancer has not yet been elucidated.</i>                                                                                                                             | doi: <a href="https://doi.org/10.1007/s00439-018-1965-1">10.1007/s00439-018-1965-1</a>                                          |
| <i>2200002D01Rik</i> | The gene 2200002D01Rik is a protein-coding gene in mice, also known as RIKEN cDNA 2200002D01 gene.                                                                                                                     | <i>The association of 2200002D01Rik with colon cancer has not yet been elucidated.</i>                                                                                                                      | <a href="https://www.ncbi.nlm.nih.gov/gene/72275">https://www.ncbi.nlm.nih.gov/gene/72275</a>                                   |
| <i>Dnajc13</i>       | DNAJC13 is an endosome-related protein and believed to regulate endosomal membrane trafficking.                                                                                                                        | <i>The association of Dnajc13 with colon cancer has not yet been elucidated.</i>                                                                                                                            | <a href="https://doi.org/10.1093/hmg/ddy003">https://doi.org/10.1093/hmg/ddy003</a>                                             |
| <i>Leap2</i>         | Liver-expressed antimicrobial peptide 2 (LEAP2) is a cysteine-rich, cationic antimicrobial peptide predominantly expressed in the liver.                                                                               | <i>The association of Leap2 with colon cancer has not yet been elucidated.</i>                                                                                                                              | <a href="https://doi.org/10.1016/j.fsi.2023.109225">https://doi.org/10.1016/j.fsi.2023.109225</a>                               |
| <i>Fsd1l</i>         | FSD1L (Fibronectin Type III and SPRY Domain Containing 1 Like) is a protein-coding gene associated with hydrocephalus, a condition characterized by the accumulation of cerebrospinal fluid in the brain.              | <i>The association of Fsd1l with colon cancer has not yet been elucidated.</i>                                                                                                                              | <a href="https://www.genecards.org/cgi-bin/carddisp.pl?gene=FSD1L">https://www.genecards.org/cgi-bin/carddisp.pl?gene=FSD1L</a> |

|                |                                                                                                                                                                                           |                                                                                  |                                                                                                                                 |
|----------------|-------------------------------------------------------------------------------------------------------------------------------------------------------------------------------------------|----------------------------------------------------------------------------------|---------------------------------------------------------------------------------------------------------------------------------|
| <i>Itgad</i>   | The ITGAD gene encodes the integrin alpha D protein, a component of the beta-2 integrin family of membrane glycoproteins.                                                                 | <i>The association of Itgad with colon cancer has not yet been elucidated.</i>   | <a href="https://www.genecards.org/cgi-bin/carddisp.pl?gene=ITGAD">https://www.genecards.org/cgi-bin/carddisp.pl?gene=ITGAD</a> |
| <i>Gm36640</i> | Gm36640 is a predicted gene located on mouse chromosome 6, spanning positions 135,256,550 to 135,290,997 on the positive strand. It is classified as a long non-coding RNA (lncRNA) gene. | <i>The association of Gm36640 with colon cancer has not yet been elucidated.</i> | <a href="https://www.informatics.jax.org/marker/MGI%3A5595799">https://www.informatics.jax.org/marker/MGI%3A5595799</a>         |
